# Supplementary material
Source: MDPI journal article supplement (https://www.mdpi.com/1999-4907/13/10/1718)
Supplement: s1 [file s1]

**Table S1.** 33 regions of the four *Ilex* cp genome sequence alignment (window of 600 sites) with significantly high (above 0.006) nucleotide diversity and different sequence identity (%) based on nucleotide sequence of *I. integra*.

| Window             | <i>Ilex</i> cp genome location | Locus                                        | Region     | Sequence length (bp) | $\pi$        | <i>I. rotunda</i>     |            | <i>I. cornuta</i>     |            | <i>I. x wandoensis</i> |            |
|--------------------|--------------------------------|----------------------------------------------|------------|----------------------|--------------|-----------------------|------------|-----------------------|------------|------------------------|------------|
|                    |                                |                                              |            |                      |              | Sequence Identity (%) | E value    | Sequence Identity (%) | E value    | Sequence Identity (%)  | E value    |
| 315-914            | 251-850                        | <i>trnH<sup>GUG</sup>-psbA</i>               | LSC        | 600-664              | 0.011        | 99.06                 | 0.0        | 99.67                 | 0.0        | 99.67                  | 0.0        |
| 1815-2423          | 1751-2359                      | <i>trnK<sup>UUU</sup>-matK</i>               | LSC        | 600-609              | 0.012        | 97.37                 | 0.0        | 99.84                 | 0.0        | 100                    | 0.0        |
| 4325-5044          | 4261-4979                      | <i>matK-rps16</i>                            | LSC        | 600-720              | 0.015        | 98.23                 | 5e-169     | 99.86                 | 0.0        | 100                    | 0.0        |
| 7206-7805          | 7193-7792                      | <i>rps16-trnQ<sup>UUG</sup></i>              | LSC        | 600                  | 0.026        | 97.50                 | 0.0        | 100                   | 0.0        | 100                    | 0.0        |
| 10217-10816        | 10140-10739                    | <i>trnG<sup>UCC</sup></i>                    | LSC        | 600                  | 0.014        | 98.67                 | 0.0        | 99.83                 | 0.0        | 100                    | 0.0        |
| 10467-11071        | 10449-11049                    | <i>trnG<sup>GCC</sup>-trnR<sup>UCU</sup></i> | LSC        | 601-604              | 0.021        | 98.01                 | 0.0        | 99.83                 | 0.0        | 99.83                  | 0.0        |
| 12222-12823        | 12141-12740                    | <i>atpA-atpF</i>                             | LSC        | 600-602              | 0.008        | 98.84                 | 0.0        | 99.83                 | 0.0        | 99.83                  | 0.0        |
| 14476-15080        | 14393-14993                    | <i>atpH-atpI</i>                             | LSC        | 601-605              | 0.012        | 98.67                 | 0.0        | 99.17                 | 0.0        | 99.17                  | 0.0        |
| 18737-19336        | 18648-19247                    | <i>rpoC2</i>                                 | LSC        | 600                  | 0.008        | 99.17                 | 0.0        | 99.83                 | 0.0        | 99.83                  | 0.0        |
| 25241-25840        | 25152-25751                    | <i>rpoB</i>                                  | LSC        | 600                  | 0.008        | 99.17                 | 0.0        | 99.83                 | 0.0        | 99.83                  | 0.0        |
| 27991-28593        | 27902-28502                    | <i>rpoB-trnC<sup>GCA</sup></i>               | LSC        | 600-603              | 0.017        | 98.17                 | 0.0        | 99.67                 | 0.0        | 99.67                  | 0.0        |
| 30246-30851        | 30154-30753                    | <i>petN-psbM</i>                             | LSC        | 600-606              | 0.008        | 98.18                 | 0.0        | 99.83                 | 0.0        | 99.83                  | 0.0        |
| 33524-34124        | 33407-34007                    | <i>trnT<sup>GGU</sup>-psbD</i>               | LSC        | 600-601              | 0.008        | 99.00                 | 0.0        | 99.83                 | 0.0        | 99.83                  | 0.0        |
| <b>37527-38137</b> | <b>37408-38010</b>             | <b><i>trnS<sup>UGA</sup>-psbZ</i></b>        | <b>LSC</b> | <b>602-609</b>       | <b>0.008</b> | <b>98.35</b>          | <b>0.0</b> | <b>98.36</b>          | <b>0.0</b> | <b>98.52</b>           | <b>0.0</b> |
| 38289-38896        | 38162-38765                    | <i>trnG<sup>CCC</sup>-trnM<sup>CAU</sup></i> | LSC        | 604                  | 0.012        | 97.86                 | 0.0        | 99.67                 | 0.0        | 99.67                  | 0.0        |
| 43547-44146        | 43416-44015                    | <i>psaA-ycf3</i>                             | LSC        | 600                  | 0.008        | 99.17                 | 0.0        | 100                   | 0.0        | 100                    | 0.0        |
| 46552-47155        | 46416-47017                    | <i>ycf3-trnS<sup>GGA</sup></i>               | LSC        | 600-604              | 0.008        | 98.84                 | 0.0        | 99.67                 | 0.0        | 100                    | 0.0        |
| 48337-49297        | 48168-49125                    | <i>trnT<sup>UGU</sup></i>                    | LSC        | 360-716              | 0.014        | 97.36                 | 0.0        | 99.13                 | 2e-114     | 99.13                  | 2e-114     |
| 48587-49547        | 48418-49375                    | <i>trnL<sup>UAA</sup></i>                    | LSC        | 602-958              | 0.012        | 97.81                 | 0.0        | 99.63                 | 0.0        | 99.63                  | 0.0        |
| 52950-53553        | 52776-53375                    | <i>ndhC-trnV<sup>UAC</sup></i>               | LSC        | 600-604              | 0.014        | 98.01                 | 0.0        | 99.67                 | 0.0        | 99.67                  | 0.0        |
| 56961-57570        | 56778-57379                    | <i>atpB-rbcL</i>                             | LSC        | 602-610              | 0.010        | 98.35                 | 0.0        | 98.52                 | 0.0        | 100                    | 0.0        |
| 68579-69187        | 68013-68612                    | <i>psbE-petL</i>                             | LSC        | 600-609              | 0.014        | 98.79                 | 0.0        | 100                   | 0.0        | 100                    | 0.0        |
| 74372-74981        | 73771-74374                    | <i>clpP</i>                                  | LSC        | 600-609              | 0.010        | 98.84                 | 0.0        | 99.18                 | 0.0        | 100                    | 0.0        |
| 77132-77731        | 76525-77124                    | <i>psbB-psbN</i>                             | LSC        | 600                  | 0.010        | 99.00                 | 0.0        | 99.67                 | 0.0        | 99.67                  | 0.0        |
| 77382-77981        | 76775-77374                    | <i>psbT-psbH</i>                             | LSC        | 600                  | 0.008        | 99.17                 | 0.0        | 99.83                 | 0.0        | 99.83                  | 0.0        |
| 79633-80232        | 79026-79625                    | <i>petB-petD</i>                             | LSC        | 600                  | 0.008        | 99.17                 | 0.0        | 100                   | 0.0        | 99.50                  | 0.0        |
| 82885-83490        | 82277-82876                    | <i>rpl36-rps8</i>                            | LSC        | 600-606              | 0.008        | 99.17                 | 0.0        | 99.01                 | 0.0        | 99.01                  | 0.0        |
| 85911-86516        | 85290-85889                    | <i>rpl16-rpl22</i>                           | LSC        | 600-606              | 0.008        | 98.18                 | 0.0        | 99.83                 | 0.0        | 99.83                  | 0.0        |
| 116224-116825      | 115553-116152                  | <i>ndhF-rpl32</i>                            | SSC        | 600-602              | 0.010        | 98.50                 | 0.0        | 99.83                 | 0.0        | 99.83                  | 0.0        |
| 117984-118583      | 117305-117904                  | <i>trnL<sup>UAG</sup>-ccsA</i>               | SSC        | 600                  | 0.012        | 98.83                 | 0.0        | 99.83                 | 0.0        | 100                    | 0.0        |
| 121240-121839      | 120557-121156                  | <i>ndhE</i>                                  | SSC        | 600                  | 0.010        | 99.16                 | 0.0        | 99.83                 | 0.0        | 99.83                  | 0.0        |
| 123990-124589      | 123307-123906                  | <i>ndhA</i>                                  | SSC        | 600                  | 0.008        | 99.17                 | 0.0        | 99.83                 | 0.0        | 99.83                  | 0.0        |
| 127494-128093      | 126807-127406                  | <i>ycf1</i>                                  | SSC        | 600                  | 0.014        | 98.67                 | 0.0        | 100                   | 0.0        | 100                    | 0.0        |

Note: Locus = *I. integra* cp genome used as reference sequences to identity between *I. rotunda*, *I. cornuta*, and *I. x wandoensis*.
